# Supplementary material for: Competition by aquifer materials in a bimetallic nanoparticle/persulfate system for the treatment of trichloroethylene
Source: Royal Society of Chemistry journal article supplement (doi:10.1039/c3em00285c), 2013-01-01
Supplement: c3em00285c.pdf [file c3em00285c.pdf]

Electronic Supplementary Information (ESI):

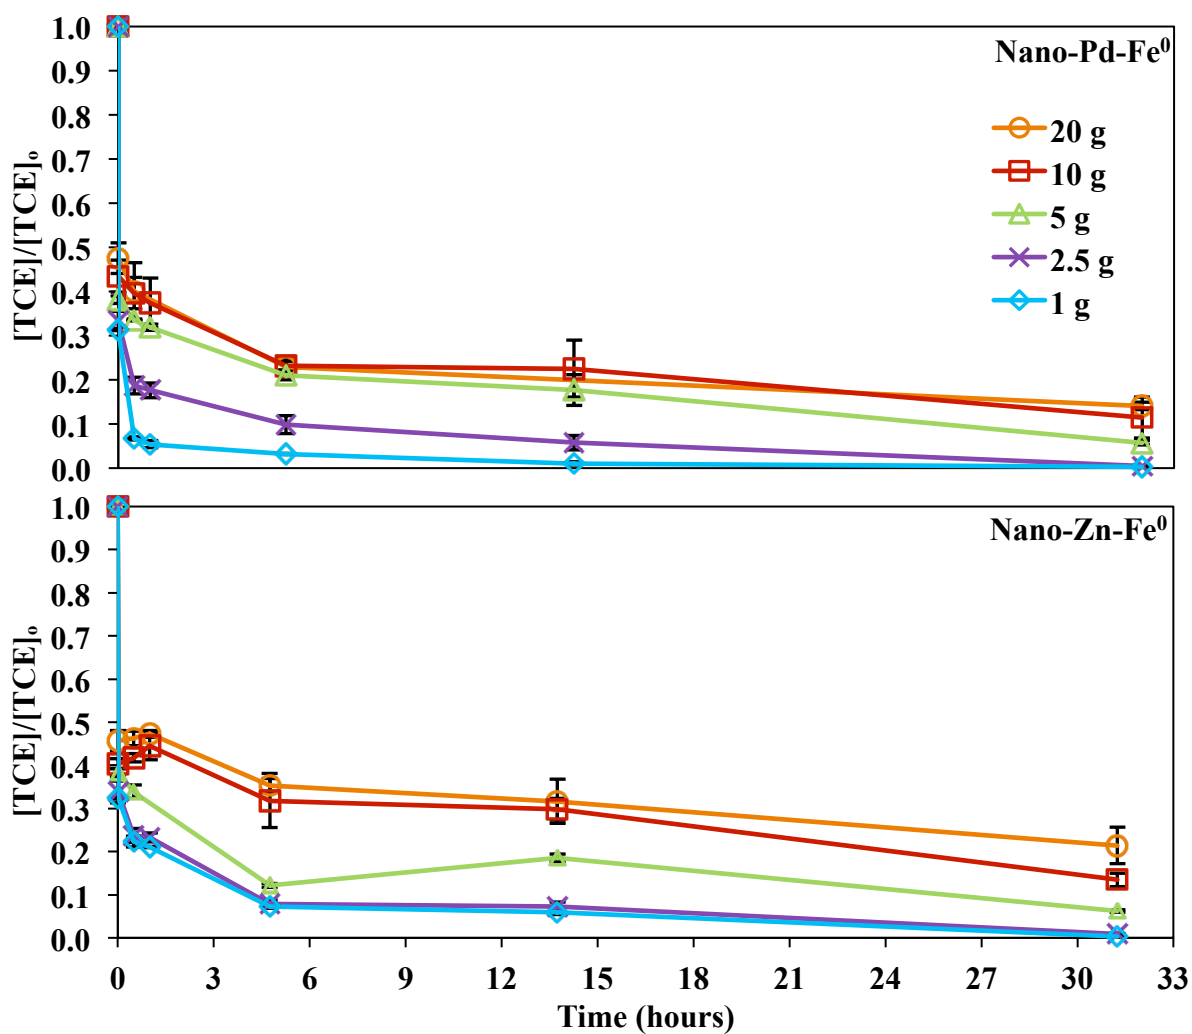

**Figure S1.** TCE treatment in the presence of LC34-LSU by nano-Pd-Fe<sup>0</sup> and nano-Zn-Fe<sup>0</sup> (the error bars represent the standard deviation of triplicate reactors).

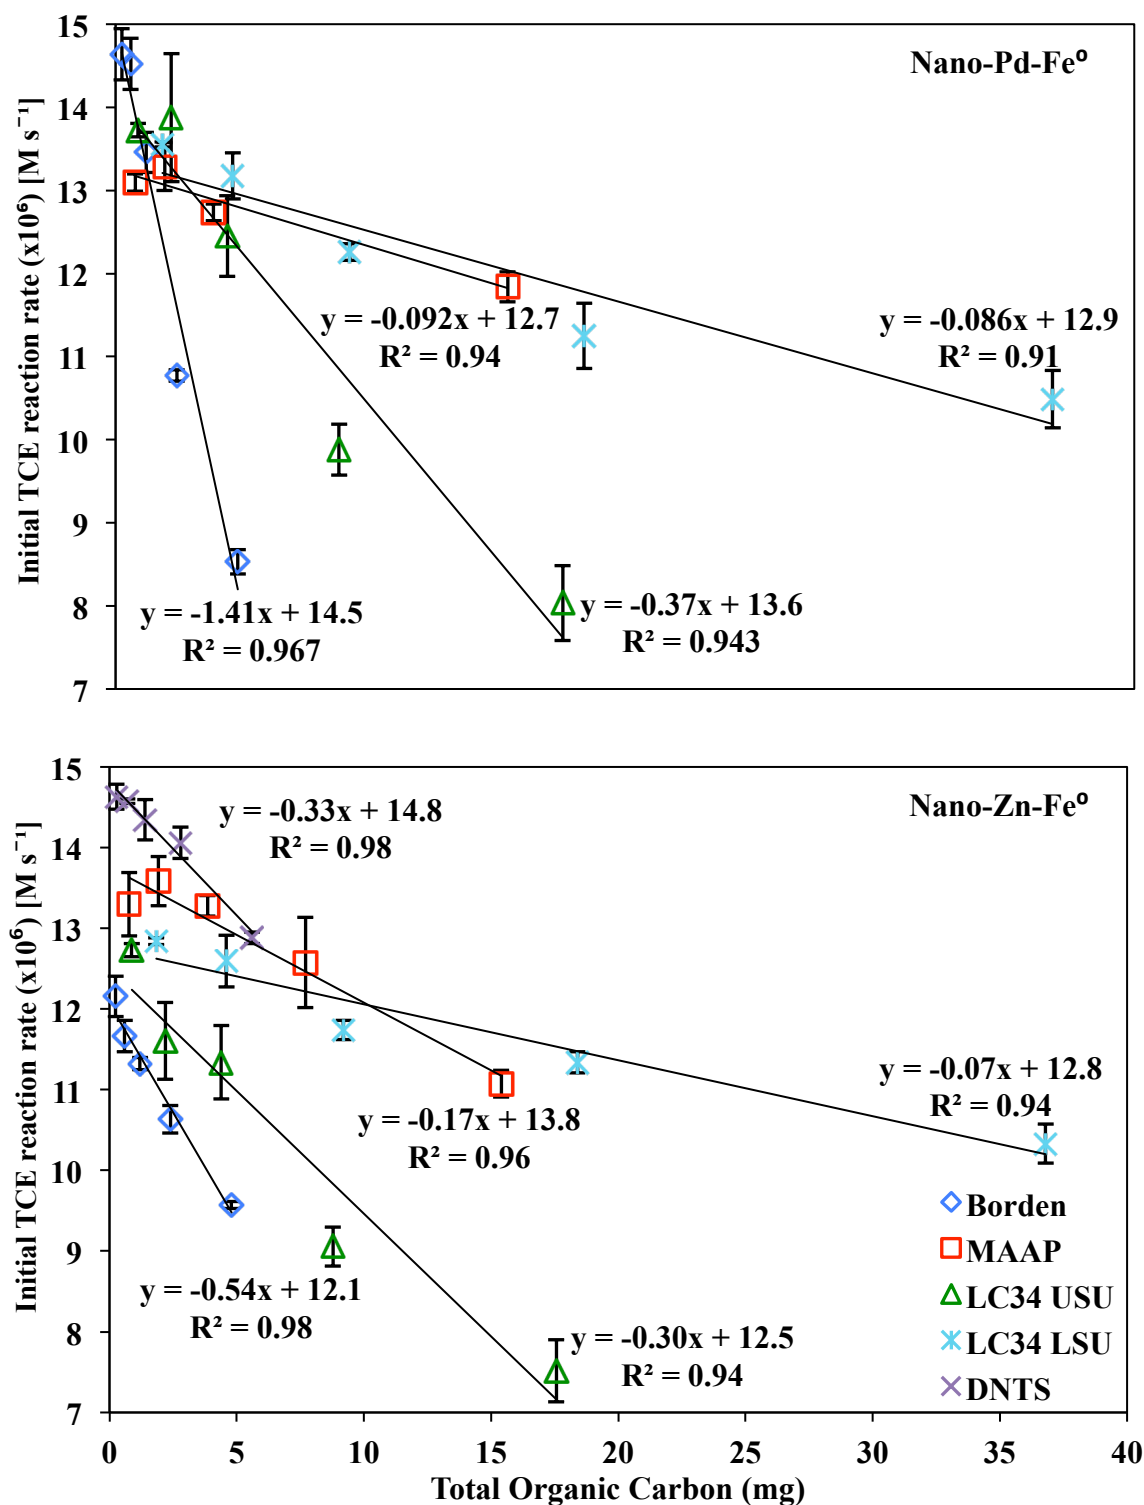

**Figure S2.** The initial TCE reaction rates plotted against the mass of OC of various aquifer materials for (a) nano-Pd-Fe<sup>0</sup> activated persulfate and (b) nano-Zn-Fe<sup>0</sup> activated persulfate (the error bars represent the standard deviation of triplicate reactors).

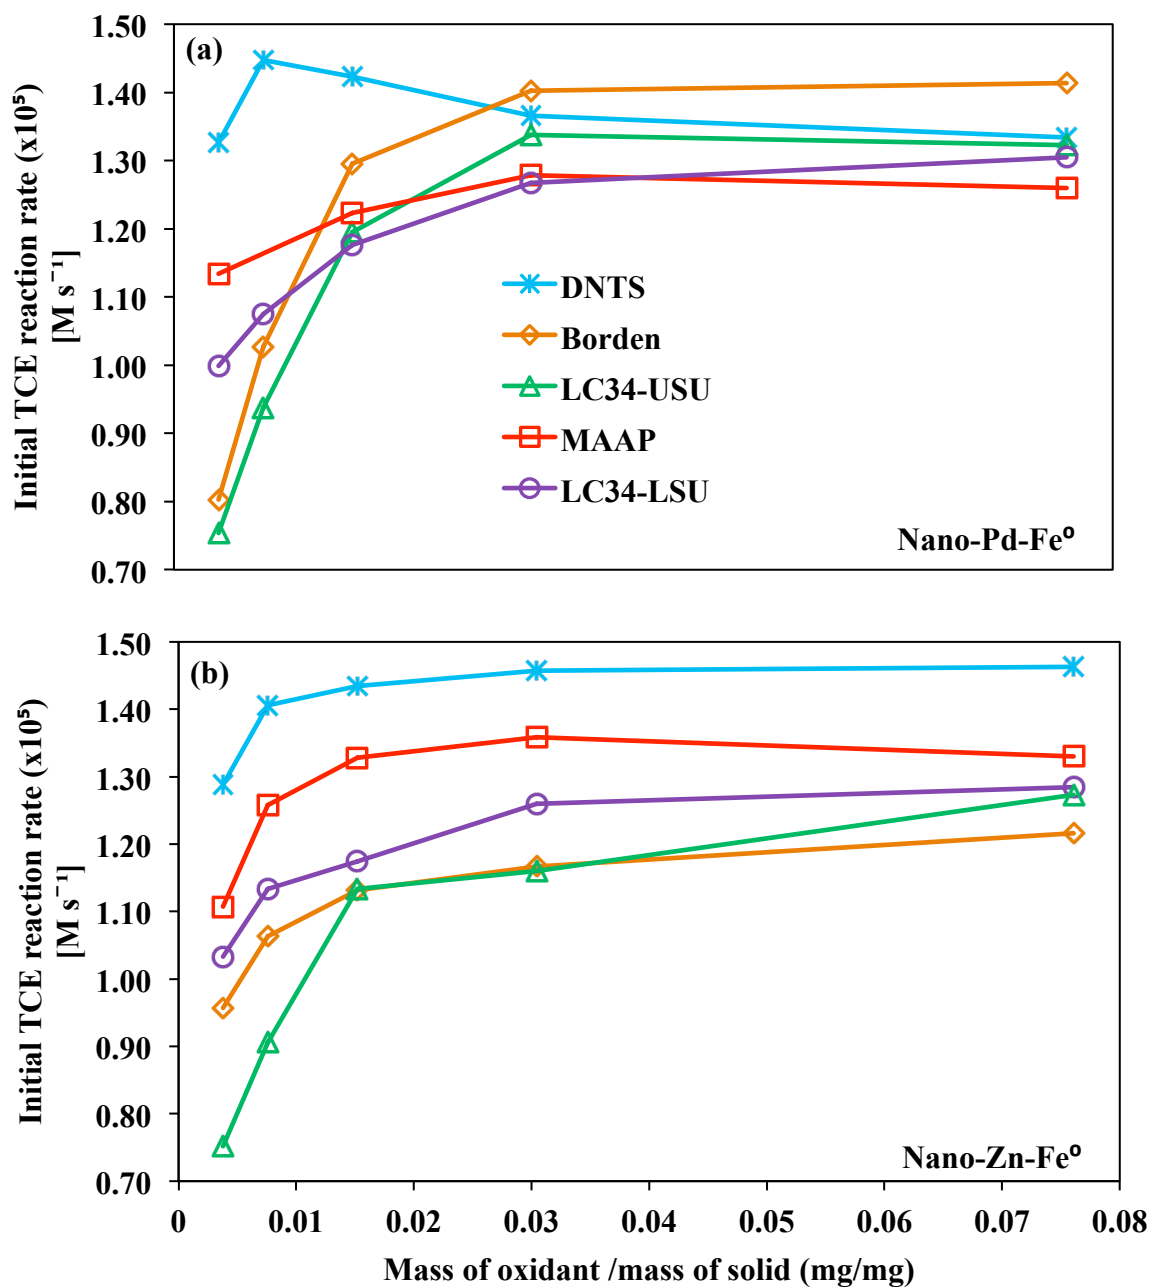

**Figure S3.** The initial TCE reaction rates plotted against the mass ratio (oxidant/solid) of various aquifer materials for (a) the nano-Pd-Fe<sup>0</sup> and (b) nano-Zn-Fe<sup>0</sup> activated persulfate systems.
